# Supplementary material for: eQTLs are key players in the integration of genomic and transcriptomic data for phenotype prediction
Source: PubMed Central journal article supplement (PMC9238188; doi:10.1186/s12864-022-08690-7), 2022-06-28

■ ORL ■ SAV

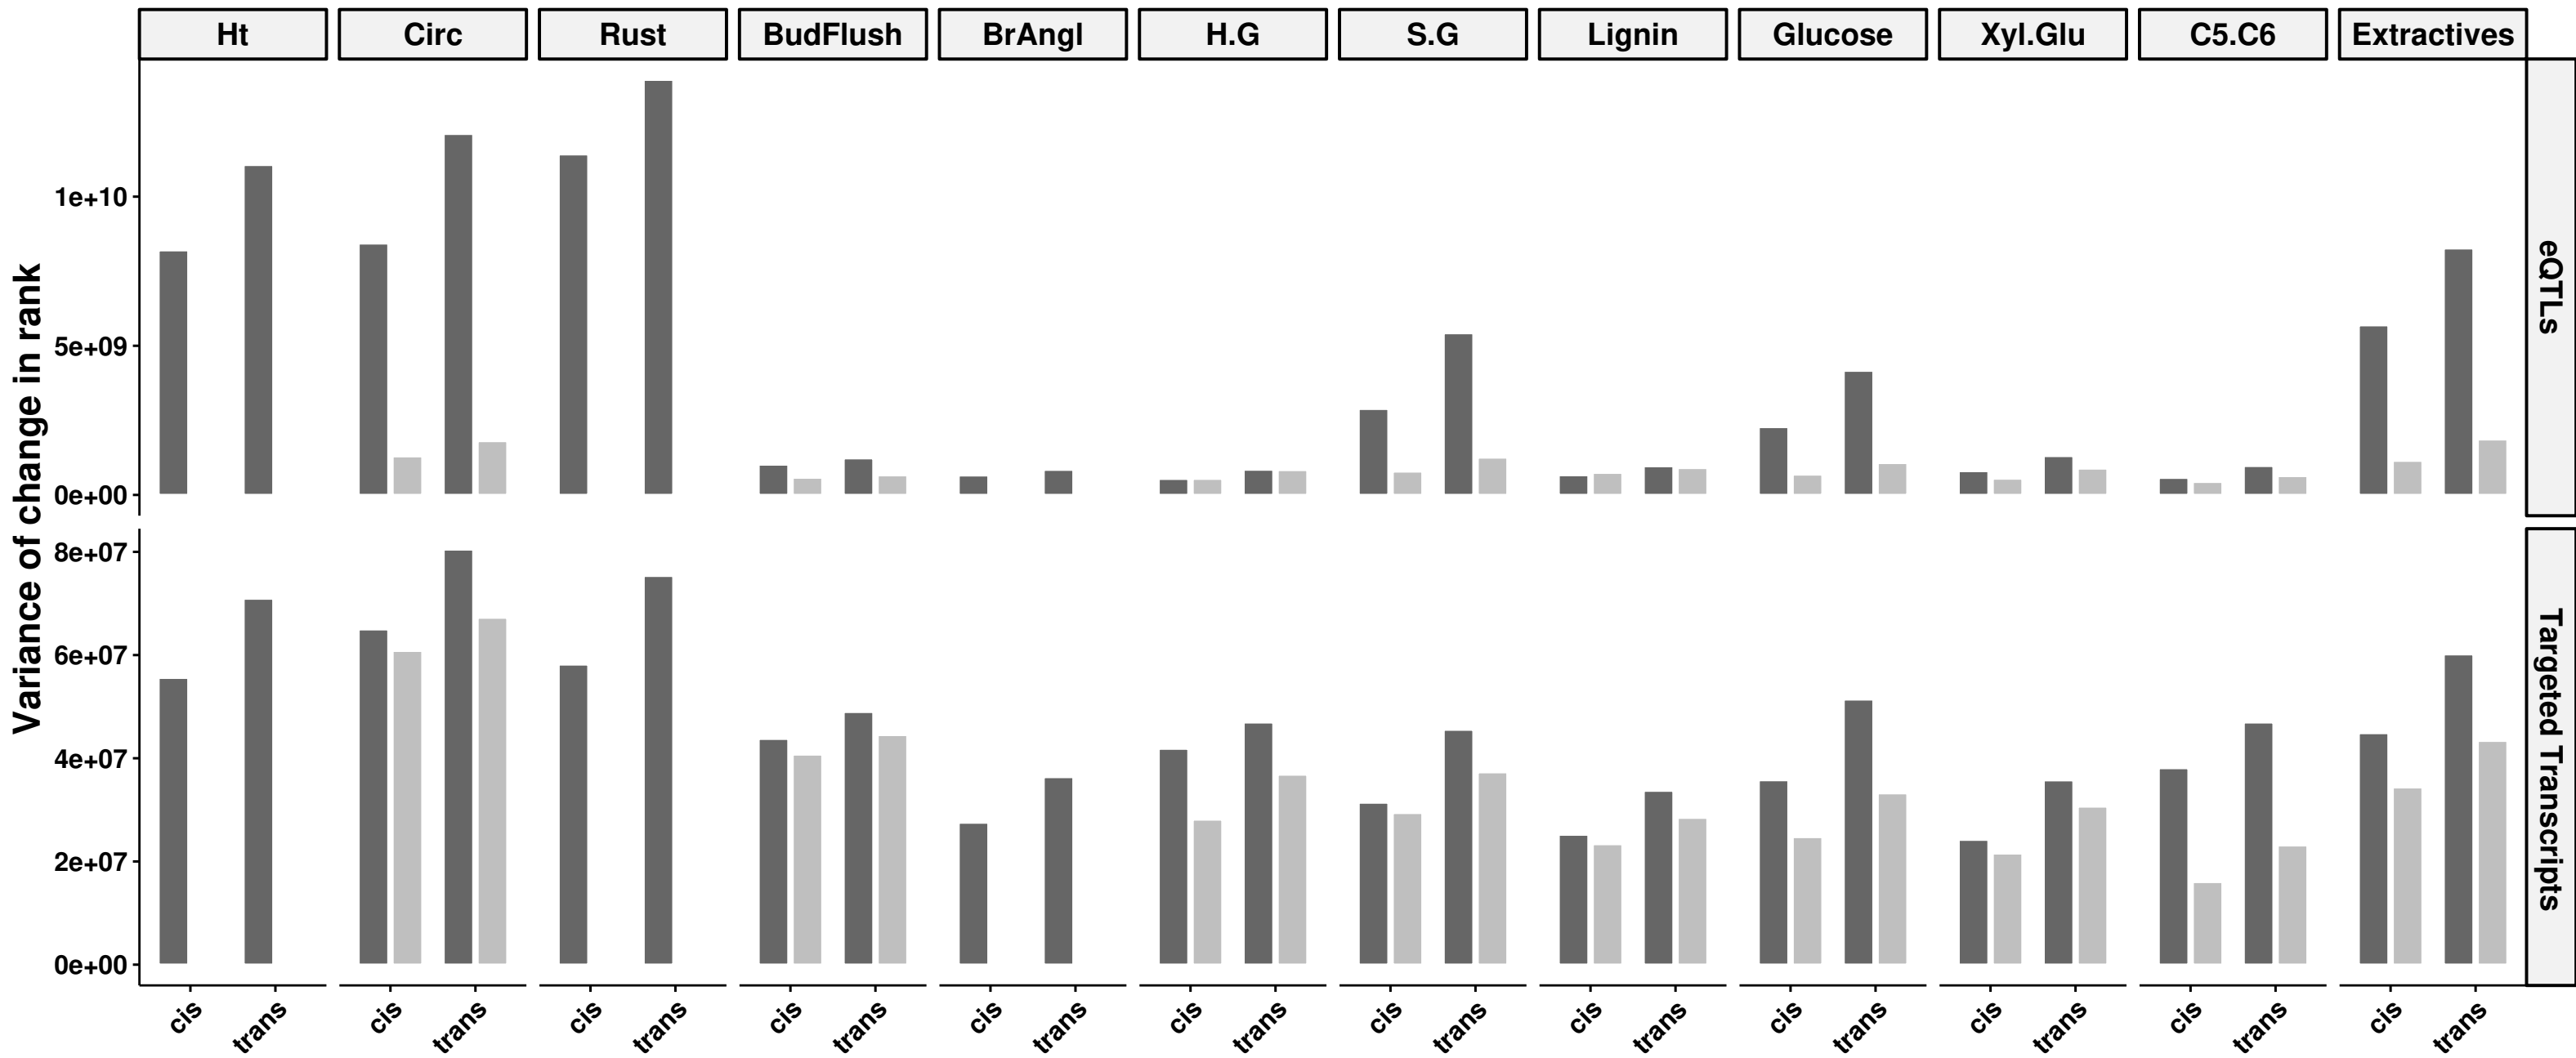

Supplement: 12864_2022_8690_MOESM3_ESM.pdf [file 12864_2022_8690_MOESM3_ESM.pdf]
