# Supplementary material for: eQTLs are key players in the integration of genomic and transcriptomic data for phenotype prediction
Source: PubMed Central journal article supplement (PMC9238188; doi:10.1186/s12864-022-08690-7), 2022-06-28
Supplement: 12864_2022_8690_MOESM6_ESM.pdf [file 12864_2022_8690_MOESM6_ESM.pdf]

A) eQTLs

mean. $R^2$ (G+T) - mean. $R^2$ (G)

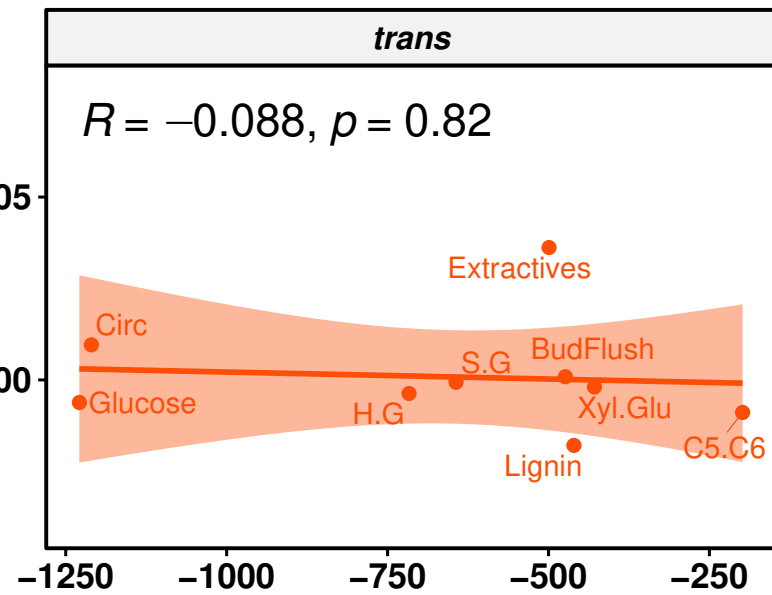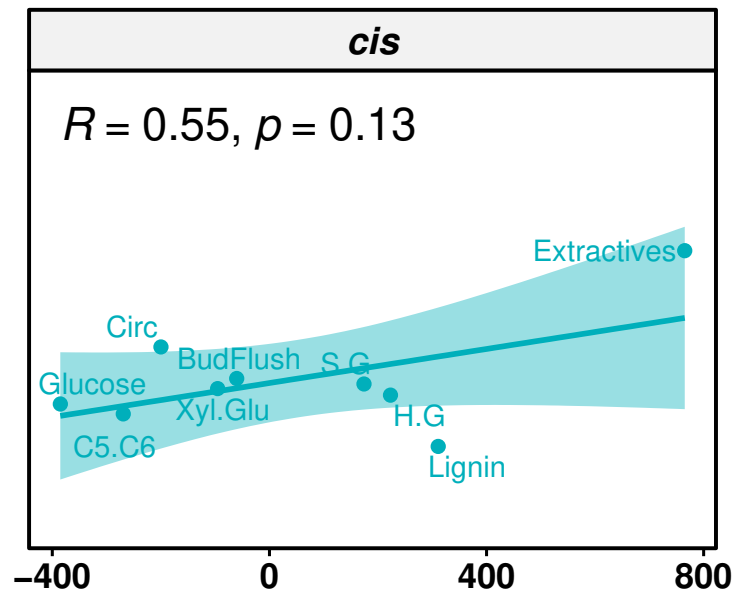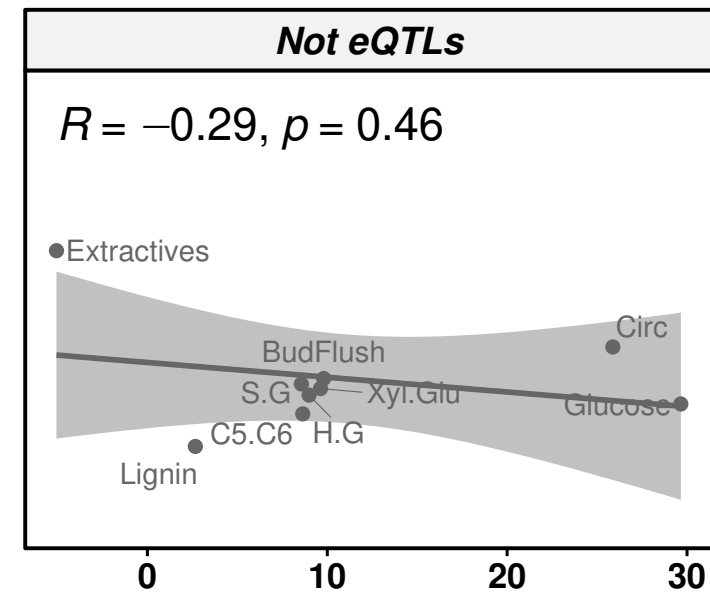

B) Targeted transcripts

mean. $R^2$ (G+T) - mean. $R^2$ (T)

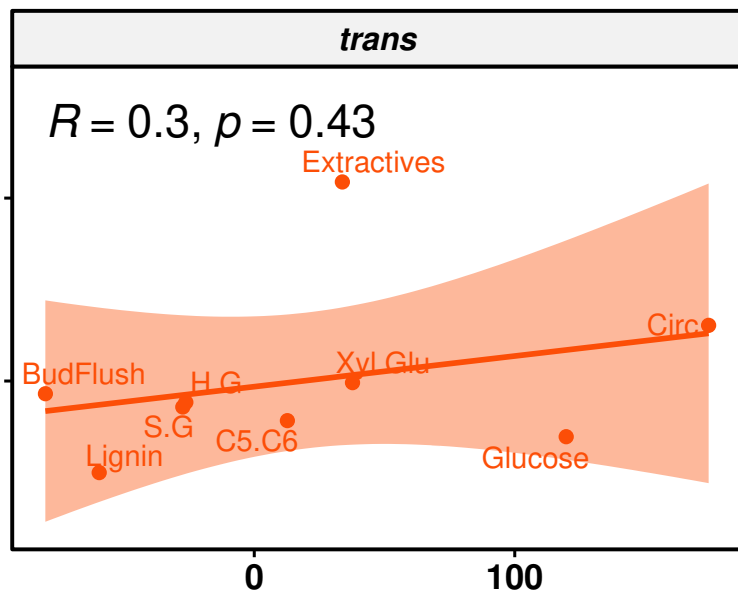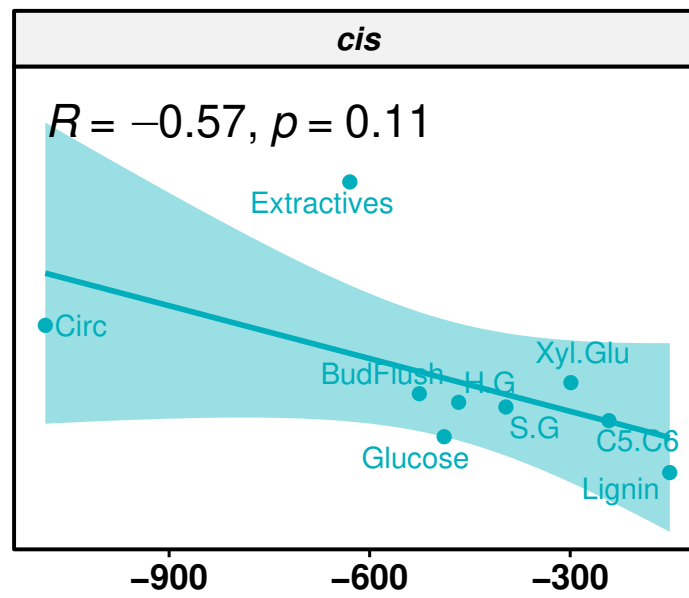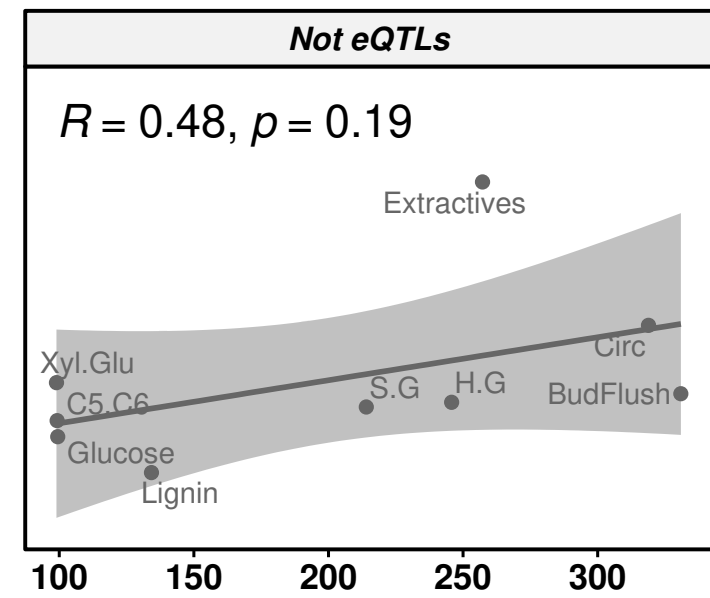

Average change in rank
